# Supplementary material for: Fecal Microbiota Signatures Are Associated with Response to Ustekinumab Therapy among Crohn’s Disease Patients
Source: PubMed Central journal article supplement (PMC5850325; doi:10.1128/mbio.02120-17), 2018-03-13

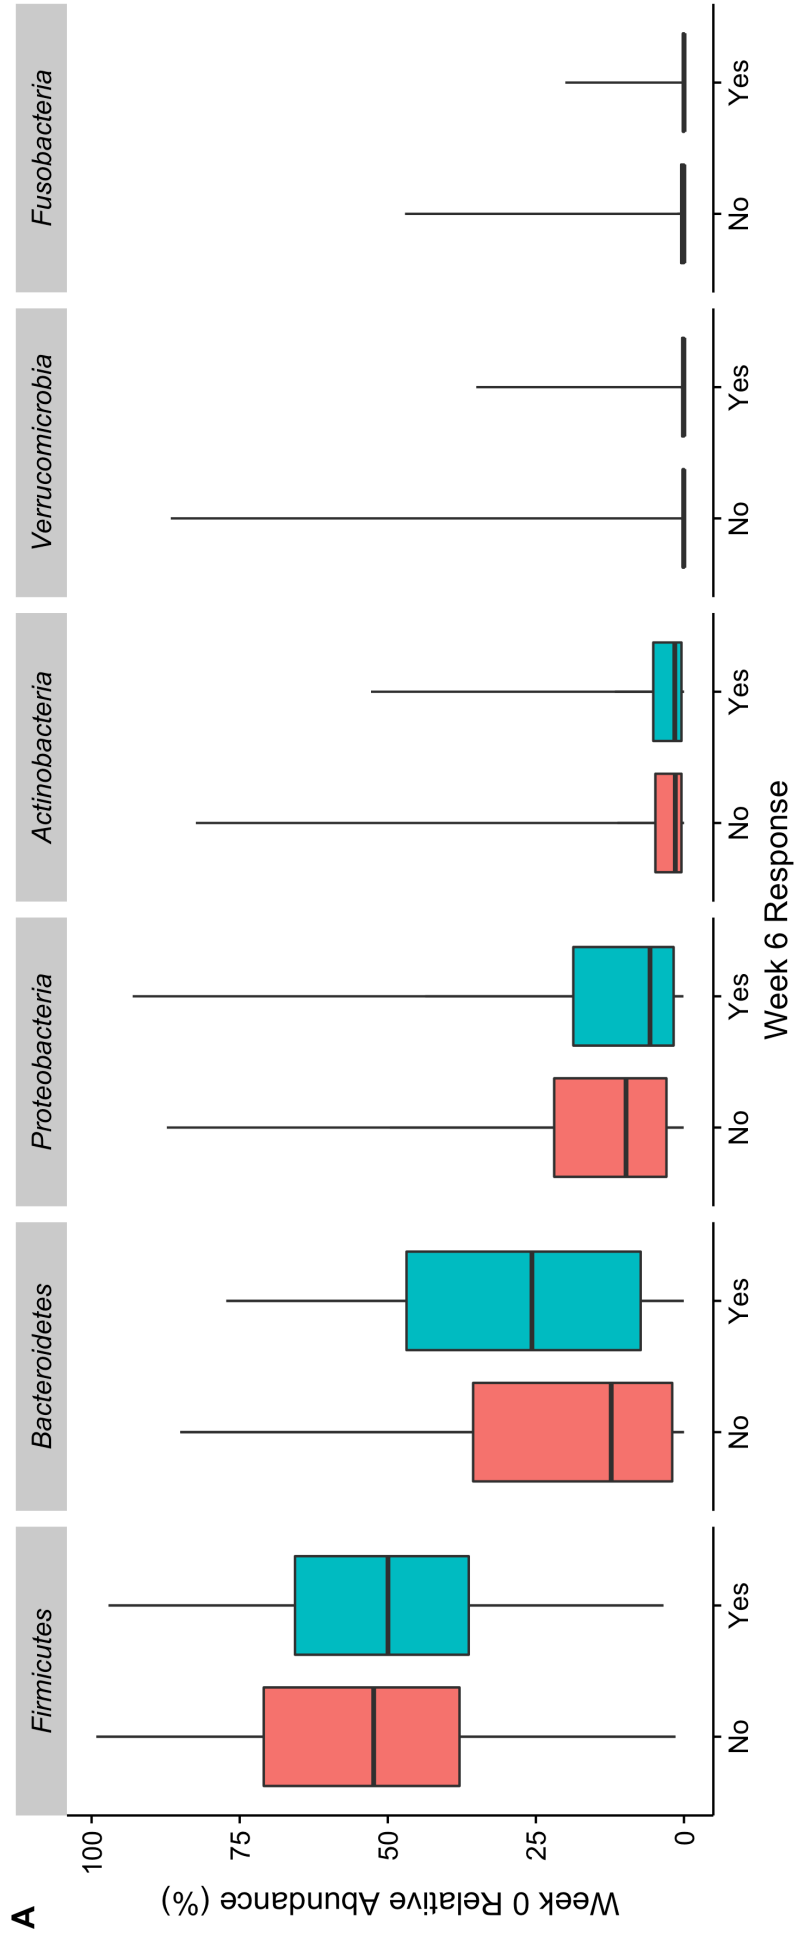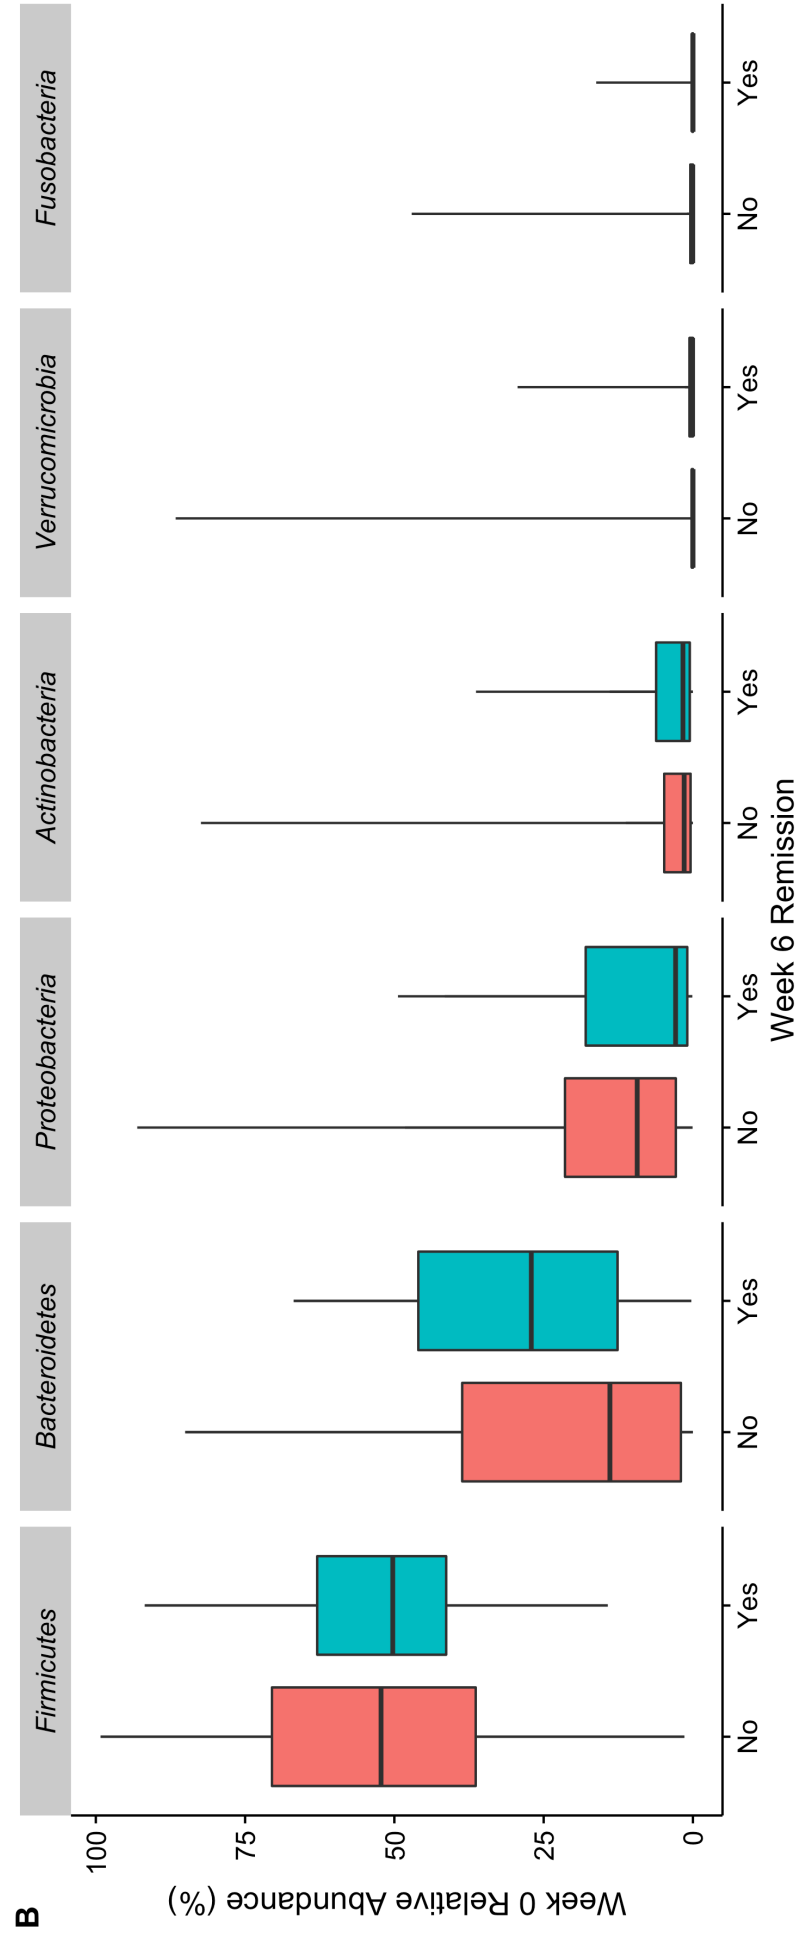

Supplement: mbo002183777sf1.pdf [file mbo002183777sf1.pdf]
