# Supplementary material for: Fecal Microbiota Signatures Are Associated with Response to Ustekinumab Therapy among Crohn’s Disease Patients
Source: PubMed Central journal article supplement (PMC5850325; doi:10.1128/mbio.02120-17), 2018-03-13
Supplement: mbo002183777st1.pdf [file mbo002183777st1.pdf]

384 **Supplemental Table 1: Diversity differences based on clinical metadata of cohort at**  
 385 **baseline**

| Clinical Variable                      | Correlation    | Alpha-Diversity (p-value) | Beta-Diversity (p-value) |
|----------------------------------------|----------------|---------------------------|--------------------------|
| CDAI                                   | $\rho = -0.2$  | 0.014                     | 0.324                    |
| Loose Stool Frequency (per week)       | $\rho = -0.2$  | 0.003                     | 0.024                    |
| C-Reactive Protein (mg/L serum)        | $\rho = 0.06$  | 0.394                     | 0.033                    |
| Fecal Calprotectin ( $\mu\text{g/g}$ ) | $\rho = 0.08$  | 0.254                     | 0.006                    |
| Fecal Lactoferrin ( $\mu\text{g/g}$ )  | $\rho = 0.1$   | 0.070                     | 0.004                    |
| BMI                                    | $\rho = 0.07$  | 0.299                     | 0.277                    |
| Weight (kg)                            | $\rho = 0.07$  | 0.299                     | 0.112                    |
| Age (years)                            | $\rho = -0.05$ | 0.472                     | 0.033                    |
| Sex (F/M)                              | -              | 0.539                     | 0.277                    |
| Corticosteroid Use (Y/N)               | -              | 0.001                     | 0.010                    |
| Disease Duration (years)               | $\rho = -0.2$  | 0.001                     | 0.004                    |
| Tissue Involvement                     | -              | 0.190                     | 0.004                    |

386
